# Supplementary material
Source: PubMed Central journal article supplement (PMC10102975)
Supplement: NIHMS1877103-supplement-Supplemental_Material.pdf [file NIHMS1877103-supplement-Supplemental_Material.pdf]

## **Appendix A: Vignette Part 1**

Michael is a 15-year-old [Black/White] male who appears in your courtroom for his disposition hearing. He was adjudicated delinquent for simple assault. This is his first arrest. A risk assessment conducted to determine his risks and needs has appraised Michael to be in the [low/moderate/high/very high] risk category.

## **Appendix B: Vignette Part 2**

Michael returns to your courtroom 6 months after his disposition hearing for a review hearing.

Michael lives with his mom and two younger sisters. He is currently in the 10<sup>th</sup> grade and is on-track academically, though he failed math in 9<sup>th</sup> grade and needed to repeat the class. Generally, he has good school attendance, missing only a handful of days throughout the year. He was suspended once, earlier this year, for fighting with a classmate. He has a history of ADHD but no history of mental health treatment.

Previously, a risk assessment measure conducted to determine his risks and needs has appraised Michael in the [low/moderate/high/very high] risk category.

**Michael appears in your courtroom after having violated his probation, screening positive for marijuana use.**
